# Supplementary material for: Effect of Enyzmes on the Quality and Predicting Glycaemic Response of Chinese Steamed Bread
Source: MDPI journal article supplement (doi:10.3390/foods12020273), 2023-01-06
Supplement: s1 [file s1]

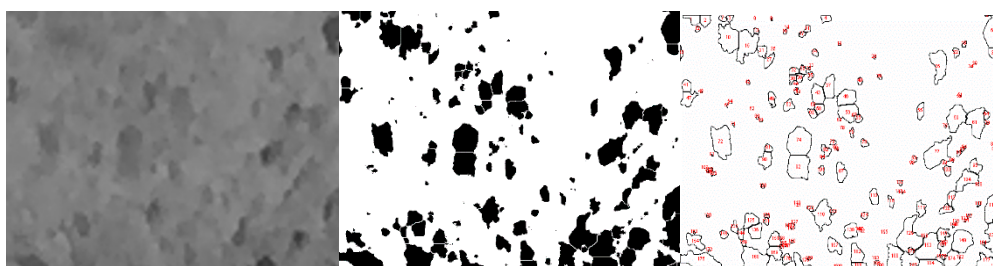

1. 15 % oat bran steamed bread

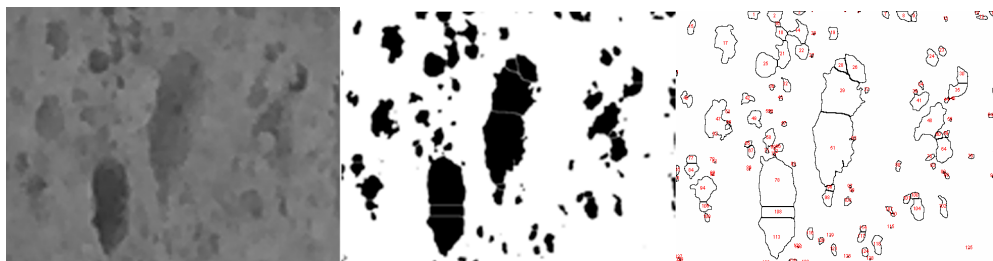

2. 15 % oat bran + 6,70,35ppm steamed bread

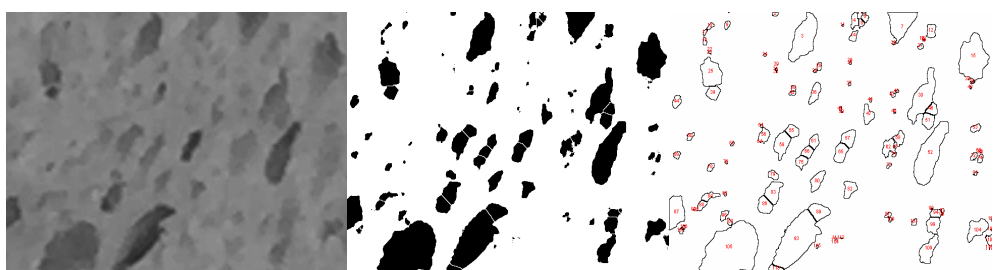

3. 15 % oat bran + 10,120,60ppm steamed bread

**Figure S1.** Image analysis of steamed bread slices

**Table S1.** Description of experimental factors at two level

| Factor  | (A) $\alpha$ – Amylase | (B) Xylanase | (C) Cellulase |
|---------|------------------------|--------------|---------------|
| Regular | -                      | -            | -             |
| Control | 0                      | 0            | 0             |
| F1      | -1                     | -1           | -1            |
| F2      | 1                      | -1           | -1            |
| F3      | -1                     | 1            | -1            |
| F4      | 1                      | 1            | -1            |
| F5      | -1                     | -1           | 1             |
| F6      | 1                      | -1           | 1             |
| F7      | -1                     | 1            | 1             |
| F8      | 1                      | 1            | 1             |

Amylase (-1, 1) – (6 ppm, 10 ppm); Xylanase (-1, 1) – (70 ppm, 120 ppm);  
Cellulase (-1, 1) – (35 ppm, 60 ppm).
